# Supplementary material for: Repeated-dose toxicity of common ragweed on rats
Source: PLoS One. 2017 May 4;12(5):e0176818. doi: 10.1371/journal.pone.0176818 (PMC5417505; doi:10.1371/journal.pone.0176818)

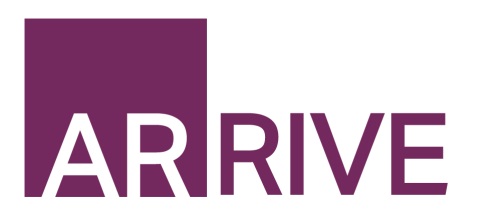


The ARRIVE Guidelines Checklist

Animal Research: Reporting In Vivo Experiments

Carol Kilkenny1, William J Browne2, Innes C Cuthill3, Michael Emerson4 and Douglas G Altman5

*1The National Centre for the Replacement, Refinement and Reduction of Animals in Research, London, UK, 2School of Veterinary Science, University of Bristol, Bristol, UK, 3School of Biological Sciences, University of Bristol, Bristol, UK, 4National Heart and Lung Institute, Imperial College London, UK, 5Centre for Statistics in Medicine, University of Oxford, Oxford, UK.*

|  | | ITEM | RECOMMENDATION | Section/ Paragraph |
| --- | --- | --- | --- | --- |
| 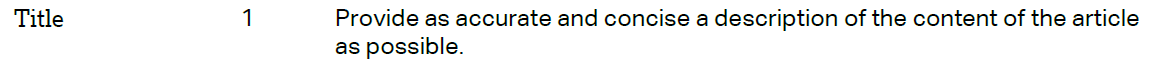 | | | Title |
| 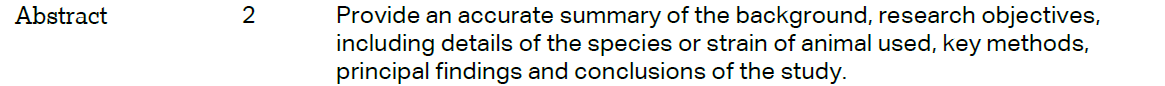 | | | Abstract |
| INTRODUCTION | | |  |
| 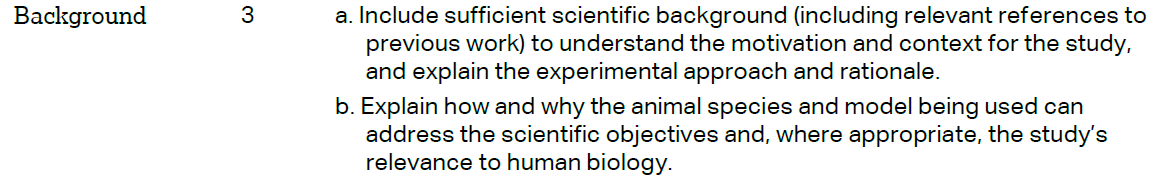 | | | Line 37-73  Line 79-91 |
| 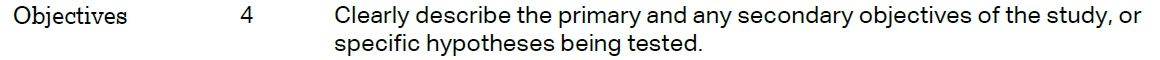 | | | Line 79-91 |
| METHODS | | |  |
| 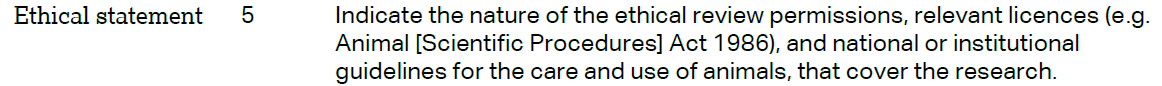 | | | Line 138-143 |
| 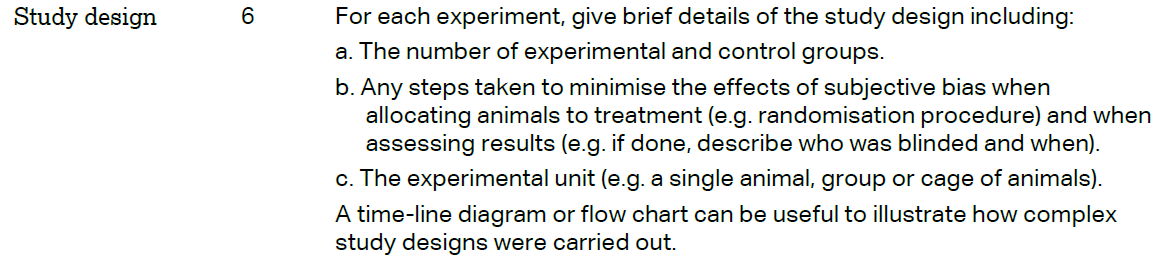 | | | Line 129-132  Line 130-134  Line 129-134  Not relevant |
| 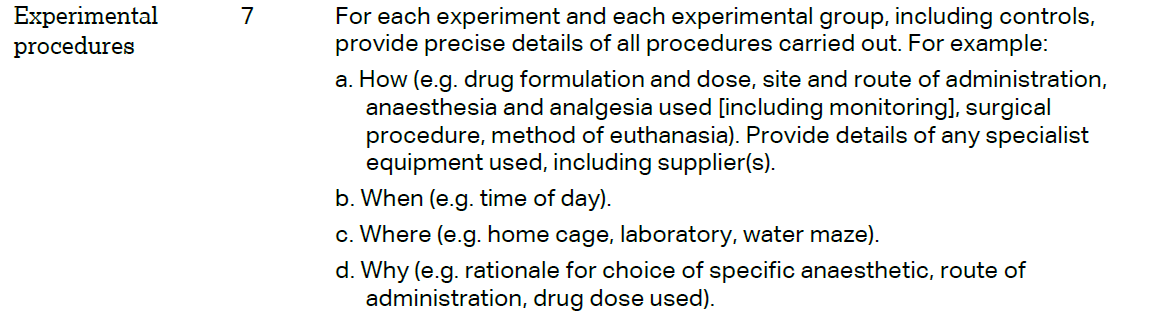 | | | Line 152-167; 174-175; 190-193, S3 Table  Line 148-151  Line 149-151  Line 174-175, 190-193 |
| 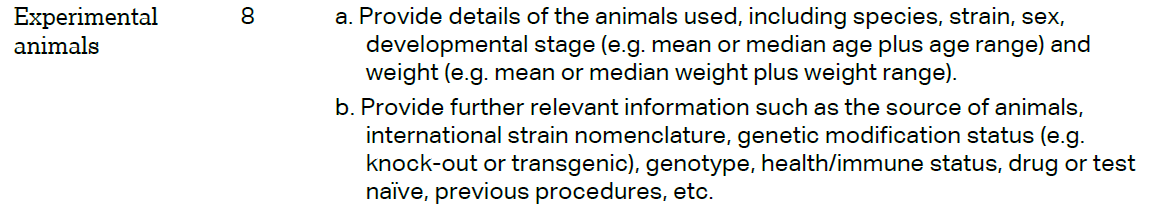 | | | Line 129-130  Not relevant |

The ARRIVE guidelines. Originally published in *PLoS Biology*, June 20101

| 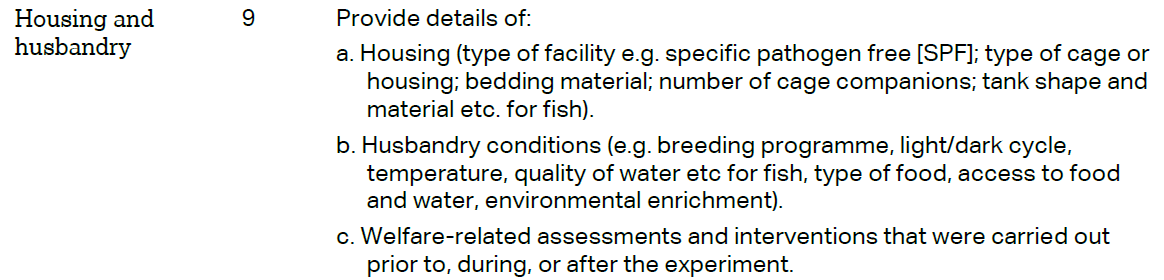 | Line 135-139  Line 135-139  Line 134-135 | |
| --- | --- | --- |
| 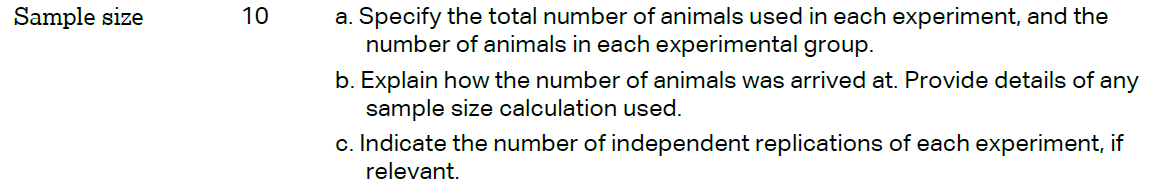 | Line 129, 132  Line 132-134  Not relevant | |
| 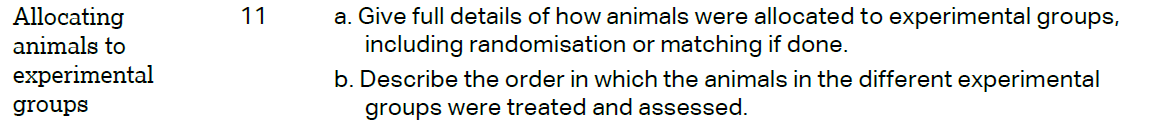 | Line 130-132  Line 149-151, 168-177 | |
| 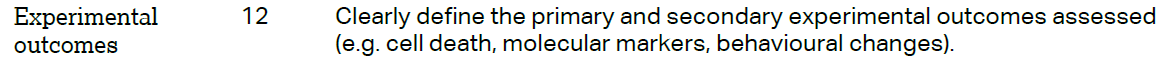 | Line180-181 | |
| 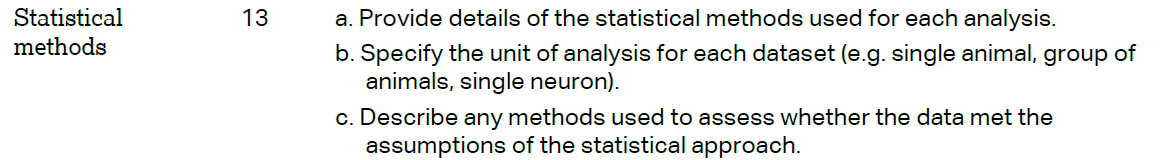 | Line 210-215  Line 214-215  Not relevant | |
| RESULTS |  | |
| 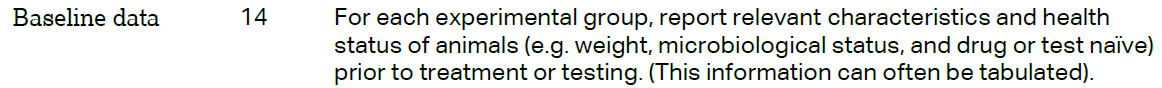 | S2 Table | |
| 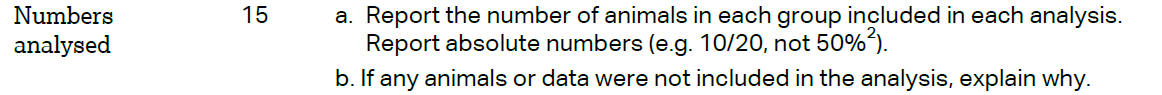 | Line 244, 247, 250, 253, 264, 274  Line 280-286 | |
| 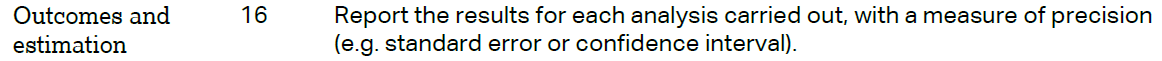 | S2, S3, S5, S6 Tables | |
| 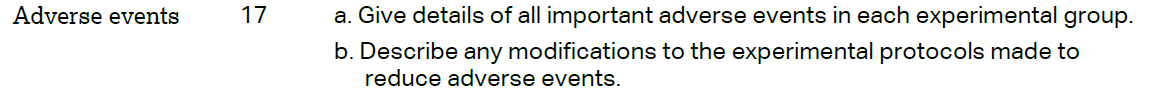 | Line 277-283  Line 283-286 | |
| DISCUSSION |  | |
| 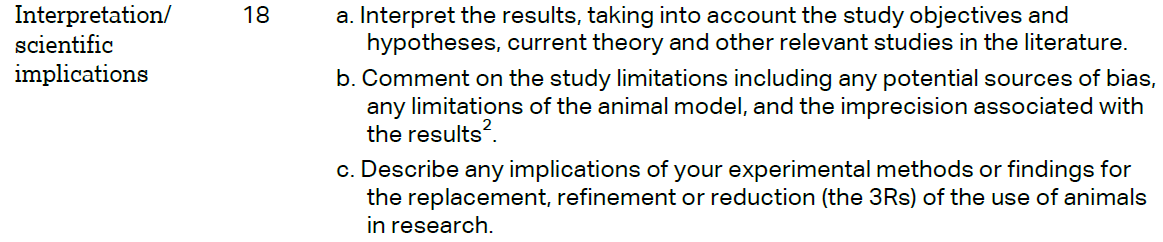 | Line 288-352  Line 353-356  Line 132-134, 174-175 | |
| 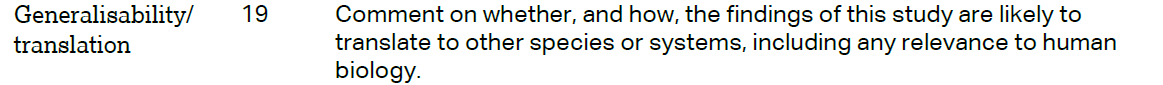 | Line 362-366 | |
| 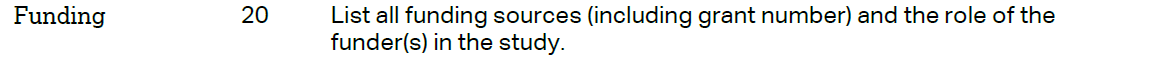 | | Acknowledgement |


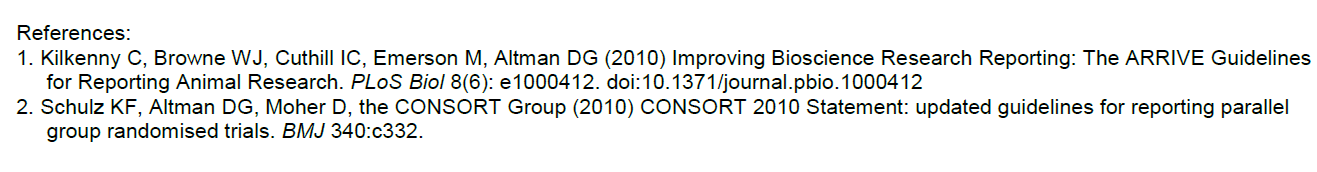

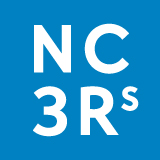

Supplement: S1 File — (DOCX) [file pone.0176818.s001.docx]
