# Supplementary material for: Repeated-dose toxicity of common ragweed on rats
Source: PLoS One. 2017 May 4;12(5):e0176818. doi: 10.1371/journal.pone.0176818 (PMC5417505; doi:10.1371/journal.pone.0176818)
Supplement: S2 File — (XLSX) [file pone.0176818.s002.xlsx]

## Sheet: S2 Table
S2. Body weights
		Treatment days
Treatment groups	Identification number of animals	1	2	3	4	5	6	7	8	9	10	11	12	13	14	15	16	17	18	19	20	21	22	23	24	25	26	27	28
Daily body weights (g) of controls	1	223	204	203	200	209	217	224	234	234	235	234	245	249	260	259	262	269	273	280	283	279	284	294	302	300	306	296	309
	2	243	231	232	236	242	245	264	271	269	273	278	278	289	299	297	311	312	230	330	324	322	326	327	340	349	353	342	355
	3	253	232	228	235	240	240	252	264	263	263	265	272	276	286	289	298	299	306	312	312	312	311	311	322	329	336	324	338
	4	239	222	226	227	229	233	241	257	255	254	259	263	270	284	283	292	295	299	306	303	304	306	310	313	326	331	324	333
	5	246	223	222	225	232	234	239	251	246	250	255	258	262	262	269	280	276	281	292	288	283	285	294	300	303	311	293	312
	6	250	233	235	234	245	242	253	268	265	267	269	277	282	293	293	303	307	311	320	315	318	319	323	338	342	352	340	358
	7	244	225	223	218	222	226	234	250	252	250	251	259	264	274	279	293	290	295	302	302	305	307	309	315	325	338	322	340
	8	266	242	245	248	250	249	264	273	272	274	280	282	291	292	296	307	307	310	323	315	313	319	322	333	330	339	297	341
	BW mean (g)	245.5	226.5	226.75	227.875	233.625	235.75	246.375	258.5	257	258.25	261.375	266.75	272.875	281.25	283.125	293.25	294.375	288.125	308.125	305.25	304.5	307.125	311.25	320.375	325.5	333.25	317.25	335.75
	SD	12.2708	11.1739	12.1391	14.3571	13.4901	10.5255	14.3122	13.1909	12.8062	13.4137	15.1085	12.6237	14.4265	14.5086	13.5693	15.9262	15.3617	27.1106	16.6856	14.1194	15.7208	15.4867	12.5556	15.5558	16.9621	17.1026	19.616	17.7422
Daily body weights (g) of LD group	9	228	212	209	210	218	218	226	237	240	239	248	246	250	257	264	271	269	274	277	278	277	278	286	289	292	300	264	300
	10	239	223	224	226	232	225	234	245	244	244	250	254	251	263	265	273	269	276	282	281	282	280	288	288	292	300	270	297
	11	241	222	217	217	225	226	232	243	244	244	247	249	247	260	269	270	274	280	286	283	280	285	286	295	296	308	275	306
	12	232	215	212	211	217	221	233	247	243	242	244	252	255	267	270	280	275	281	291	288	289	288	295	302	307	317	292	316
	13	244	225	223	29	232	244	247	268	255	261	266	276	281	294	294	306	304	318	326	315	315	319	328	342	343	347	336	360
	14	250	236	235	227	235	237	249	261	254	257	257	265	269	282	280	287	288	295	303	294	293	292	299	312	317	322	298	322
	15	239	214	221	222	228	232	239	259	252	253	261	269	270	282	282	291	294	305	311	303	305	312	315	323	326	333	303	327
	16	262	246	241	242	253	255	262	277	270	273	282	285	290	297	303	307	308	320	325	318	321	323	328	328	342	351	330	354
	BW mean (g)	241.875	224.125	222.75	198	230	232.25	240.25	254.625	250.25	251.625	256.875	262	264.125	275.25	278.375	285.625	285.125	293.625	297.125	295	295.25	297.125	303.125	309.875	314.375	322.25	296	322.75
	SD	10.5754	11.7039	10.8595	69.0466	11.3641	12.5328	11.7078	13.8145	9.75046	11.612	12.6541	14	15.8604	15.5816	14.1919	14.8895	15.6428	18.7536	18.0668	15.455	16.6197	18.0668	18.0352	19.766	21.1048	19.9123	26.6351	23.5721
Daily body weights (g) of HD group	17	232	215	216	212	225	224	234	245	245	246	249	254	255	260	266	274	274	281	288	286	283	288	288	298	300	311	301	313
	18	243	230	228	227	232	234	247	264	261	263	273	278	280	292	291	308	300	312	321	310	316	318	319	335	328	344	310	342
	19	245	229	231	226	235	237	245	261	254	258	264	267	267	277	278	288	287	298	304	397	303	304	307	313	318	327	298	327
	20	230	213	212	209	213	218	224	234	236	233	240	242	245	252	261	265	259	271	274	267	270	280	278	283	288	300	265	295
	21	242	224	230	231	237	235	245	256	258	258	271	272	273	288	290	297	299	310	315	313	313	316	317	330	333	344	308	340
	22	247	225	228	227	231	232	243	248	250	247	253	254	255	266	269	278	276	287	293	289	287	292	299	307	310	319	283	324
	23	279	232	238	232	238	237	248	260	257	258	262	264	267	280	283	286	291	298	307	296	302	305	303	314	321	327	286	329
	24	248	230	234	235	243	241	254	265	261	264	267	272	276	290	291	301	299	305	318	307	307	315	311	330	326	335	307	335
	BW mean (g)	245.75	224.75	227.125	224.875	231.75	232.25	242.5	254.125	252.75	253.375	259.875	262.875	264.75	275.625	278.625	287.125	285.625	295.25	302.5	308.125	297.625	302.25	302.75	313.75	315.5	325.875	294.75	325.625
	SD	14.9833	7.16639	8.80645	9.4027	9.26977	7.59229	9.33503	10.8685	8.7137	10.5551	11.5194	11.9933	12.0564	14.851	12.0586	14.5055	14.7932	14.479	16.362	38.9521	16.0351	14.2102	14.1295	17.8065	15.2877	15.496	15.6182	15.4729
Abbreviations:
BW: body weight
LD: low dose = 500 mg/kg b. w.
HD: high dose = 1000 mg/kg b. w.
SD: standard deviation
