# Supplementary material for: Repeated-dose toxicity of common ragweed on rats
Source: PLoS One. 2017 May 4;12(5):e0176818. doi: 10.1371/journal.pone.0176818 (PMC5417505; doi:10.1371/journal.pone.0176818)
Supplement: S3 File — (XLSX) [file pone.0176818.s003.xlsx]

## Sheet: S3 Table
S3. Amount of cookie dough eaten
Treatment groups	Identification number of animals	Treatment days
		1			2			3			4			5			6			7			8			9			10			11			12			13			14			15			16
		Daily bw.	Amount of cookie dough eaten	Amount of ragweed puree eaten	Daily bw.	Amount of cookie dough eaten	Amount of ragweed puree eaten	Daily bw.	Amount of cookie dough eaten	Amount of ragweed puree eaten	Daily bw.	Amount of cookie dough eaten	Amount of ragweed puree eaten	Daily bw.	Amount of cookie dough eaten	Amount of ragweed puree eaten	Daily bw.	Amount of cookie dough eaten	Amount of ragweed puree eaten	Daily bw.	Amount of cookie dough eaten	Amount of ragweed puree eaten	Daily bw.	Amount of cookie dough eaten	Amount of ragweed puree eaten	Daily bw.	Amount of cookie dough eaten	Amount of ragweed puree eaten	Daily bw.	Amount of cookie dough eaten	Amount of ragweed puree eaten	Daily bw.	Amount of cookie dough eaten	Amount of ragweed puree eaten	Daily bw.	Amount of cookie dough eaten	Amount of ragweed puree eaten	Daily bw.	Amount of cookie dough eaten	Amount of ragweed puree eaten	Daily bw.	Amount of cookie dough eaten	Amount of ragweed puree eaten	Daily bw.	Amount of cookie dough eaten	Amount of ragweed puree eaten	Daily bw.	Amount of cookie dough eaten	Amount of ragweed puree eaten
Control group	1	223	0.892	0.223	204	0.816	0.204	203	0.812	0.203	200	0.8	0.2	209	0.836	0.209	217	0.868	0.217	224	0.896	0.224	234	0.936	0.234	234	0.936	0.234	235	0.94	0.235	234	0.936	0.234	245	0.98	0.245	249	0.996	0.249	260	1.04	0.26	259	1.036	0.259	262	1.048	0.262
	2	243	0.972	0.243	231	0.924	0.231	232	0.928	0.232	236	0.944	0.236	242	0.968	0.242	245	0.98	0.245	264	1.056	0.264	271	1.084	0.271	269	1.076	0.269	273	1.092	0.273	278	1.112	0.278	278	1.112	0.278	289	1.156	0.289	299	1.196	0.299	297	1.188	0.297	311	1.244	0.311
	3	253	1.012	0.253	232	0.928	0.232	228	0.912	0.228	235	0.94	0.235	240	0.96	0.24	240	0.96	0.24	252	1.008	0.252	264	1.056	0.264	263	1.052	0.263	263	1.052	0.263	265	1.06	0.265	272	1.088	0.272	276	1.104	0.276	286	1.144	0.286	289	1.156	0.289	298	1.192	0.298
	4	239	0.956	0.239	222	0.888	0.222	226	0.904	0.226	227	0.908	0.227	229	0.916	0.229	233	0.932	0.233	241	0.964	0.241	257	1.028	0.257	255	1.02	0.255	254	1.016	0.254	259	1.036	0.259	263	1.052	0.263	270	1.08	0.27	284	1.136	0.284	283	1.132	0.283	292	1.168	0.292
	5	246	0.984	0.246	223	0.892	0.223	222	0.888	0.222	225	0.9	0.225	232	0.928	0.232	234	0.936	0.234	239	0.956	0.239	251	1.004	0.251	246	0.984	0.246	250	1	0.25	255	1.02	0.255	258	1.032	0.258	262	1.048	0.262	262	1.048	0.262	269	1.076	0.269	280	1.12	0.28
	6	250	1	0.25	233	0.932	0.233	235	0.94	0.235	234	0.936	0.234	245	0.98	0.245	242	0.968	0.242	253	1.012	0.253	268	1.072	0.268	265	1.06	0.265	267	1.068	0.267	269	1.076	0.269	277	1.108	0.277	282	1.128	0.282	293	1.172	0.293	293	1.172	0.293	303	1.212	0.303
	7	244	0.976	0.244	225	0.9	0.225	223	0.892	0.223	218	0.872	0.218	222	0.888	0.222	226	0.904	0.226	234	0.936	0.234	250	1	0.25	252	1.008	0.252	250	1	0.25	251	1.004	0.251	259	1.036	0.259	264	1.056	0.264	274	1.096	0.274	279	1.116	0.279	293	1.172	0.293
	8	266	1.064	0.266	242	0.968	0.242	245	0.98	0.245	248	0.992	0.248	250	1	0.25	249	0.996	0.249	264	1.056	0.264	273	1.092	0.273	272	1.088	0.272	274	1.096	0.274	280	1.12	0.28	282	1.128	0.282	291	1.164	0.291	292	1.168	0.292	296	1.184	0.296	307	1.228	0.307
	Mean (g)	245.5	0.982	0.2455	226.5	0.906	0.2265	226.75	0.907	0.22675	227.875	0.9115	0.227875	233.625	0.9345	0.233625	235.75	0.943	0.23575	246.375	0.9855	0.246375	258.5	1.034	0.2585	257	1.028	0.257	258.25	1.033	0.25825	261.375	1.0455	0.261375	266.75	1.067	0.26675	272.875	1.0915	0.272875	281.25	1.125	0.28125	283.125	1.1325	0.283125	293.25	1.173	0.29325
	SD	12.2708	0.049083	0.0122708	11.1739	0.0446958	0.0111739	12.1391	0.0485563	0.0121391	14.3571	0.0574282	0.0143571	13.4901	0.0539603	0.0134901	10.5255	0.0421019	0.0105255	14.3122	0.0572488	0.0143122	13.1909	0.0527636	0.0131909	12.8062	0.051225	0.0128062	13.4137	0.053655	0.0134137	15.1085	0.0604341	0.0151085	12.6237	0.0504947	0.0126237	14.4265	0.0577062	0.0144265	14.5086	0.0580345	0.0145086	13.5693	0.0542771	0.0135693	15.9262	0.0637047	0.0159262
Low dose group	9	228	0.912	0.228	212	0.848	0.212	209	0.836	0.209	210	0.84	0.21	218	0.872	0.218	218	0.872	0.218	226	0.904	0.226	237	0.948	0.237	240	0.96	0.24	239	0.956	0.239	248	0.992	0.248	246	0.984	0.246	250	1	0.25	257	1.028	0.257	264	1.056	0.264	271	1.084	0.271
	10	239	0.956	0.239	223	0.892	0.223	224	0.896	0.224	226	0.904	0.226	232	0.928	0.232	225	0.9	0.225	234	0.936	0.234	245	0.98	0.245	244	0.976	0.244	244	0.976	0.244	250	1	0.25	254	1.016	0.254	251	1.004	0.251	263	1.052	0.263	265	1.06	0.265	273	1.092	0.273
	11	241	0.964	0.241	222	0.888	0.222	217	0.868	0.217	217	0.868	0.217	225	0.9	0.225	226	0.904	0.226	232	0.928	0.232	243	0.972	0.243	244	0.976	0.244	244	0.976	0.244	247	0.988	0.247	249	0.996	0.249	247	0.988	0.247	260	1.04	0.26	269	1.076	0.269	270	1.08	0.27
	12	232	0.928	0.232	215	0.86	0.215	212	0.848	0.212	211	0.844	0.211	217	0.868	0.217	221	0.884	0.221	233	0.932	0.233	247	0.988	0.247	243	0.972	0.243	242	0.968	0.242	244	0.976	0.244	252	1.008	0.252	255	1.02	0.255	267	1.068	0.267	270	1.08	0.27	280	1.12	0.28
	13	244	0.976	0.244	225	0.9	0.225	223	0.892	0.223	29	0.116	0.029	232	0.928	0.232	244	0.976	0.244	247	0.988	0.247	268	1.072	0.268	255	1.02	0.255	261	1.044	0.261	266	1.064	0.266	276	1.104	0.276	281	1.124	0.281	294	1.176	0.294	294	1.176	0.294	306	1.224	0.306
	14	250	1	0.25	236	0.944	0.236	235	0.94	0.235	227	0.908	0.227	235	0.94	0.235	237	0.948	0.237	249	0.996	0.249	261	1.044	0.261	254	1.016	0.254	257	1.028	0.257	257	1.028	0.257	265	1.06	0.265	269	1.076	0.269	282	1.128	0.282	280	1.12	0.28	287	1.148	0.287
	15	239	0.956	0.239	214	0.856	0.214	221	0.884	0.221	222	0.888	0.222	228	0.912	0.228	232	0.928	0.232	239	0.956	0.239	259	1.036	0.259	252	1.008	0.252	253	1.012	0.253	261	1.044	0.261	269	1.076	0.269	270	1.08	0.27	282	1.128	0.282	282	1.128	0.282	291	1.164	0.291
	16	262	1.048	0.262	246	0.984	0.246	241	0.964	0.241	242	0.968	0.242	253	1.012	0.253	255	1.02	0.255	262	1.048	0.262	277	1.108	0.277	270	1.08	0.27	273	1.092	0.273	282	1.128	0.282	285	1.14	0.285	290	1.16	0.29	297	1.188	0.297	303	1.212	0.303	307	1.228	0.307
	Mean (g)	241.875	0.9675	0.241875	224.125	0.8965	0.224125	222.75	0.891	0.22275	198	0.792	0.198	230	0.92	0.23	232.25	0.929	0.23225	240.25	0.961	0.24025	254.625	1.0185	0.254625	250.25	1.001	0.25025	251.625	1.0065	0.251625	256.875	1.0275	0.256875	262	1.048	0.262	264.125	1.0565	0.264125	275.25	1.101	0.27525	278.375	1.1135	0.278375	285.625	1.1425	0.285625
	SD	10.5754	0.0423016	0.0105754	11.7039	0.0468157	0.0117039	10.8595	0.043438	0.0108595	69.0466	0.276186	0.0690466	11.3641	0.0454564	0.0113641	12.5328	0.0501313	0.0125328	11.7078	0.046831	0.0117078	13.8145	0.0552578	0.0138145	9.75046	0.0390018	0.00975046	11.612	0.0464481	0.011612	12.6541	0.0506162	0.0126541	14	0.056	0.014	15.8604	0.0634418	0.0158604	15.5816	0.0623263	0.0155816	14.1919	0.0567677	0.0141919	14.8895	0.0595579	0.0148895
	17	232	0.928	0.232	215	0.86	0.215	216	0.864	0.216	212	0.848	0.212	225	0.9	0.225	224	0.896	0.224	234	0.936	0.234	245	0.98	0.245	245	0.98	0.245	246	0.984	0.246	249	0.996	0.249	254	1.016	0.254	255	1.02	0.255	260	1.04	0.26	266	1.064	0.266	274	1.096	0.274
	18	243	0.972	0.243	230	0.92	0.23	228	0.912	0.228	227	0.908	0.227	232	0.928	0.232	234	0.936	0.234	247	0.988	0.247	264	1.056	0.264	261	1.044	0.261	263	1.052	0.263	273	1.092	0.273	278	1.112	0.278	280	1.12	0.28	292	1.168	0.292	291	1.164	0.291	308	1.232	0.308
	19	245	0.98	0.245	229	0.916	0.229	231	0.924	0.231	226	0.904	0.226	235	0.94	0.235	237	0.948	0.237	245	0.98	0.245	261	1.044	0.261	254	1.016	0.254	258	1.032	0.258	264	1.056	0.264	267	1.068	0.267	267	1.068	0.267	277	1.108	0.277	278	1.112	0.278	288	1.152	0.288
	20	230	0.92	0.23	213	0.852	0.213	212	0.848	0.212	209	0.836	0.209	213	0.852	0.213	218	0.872	0.218	224	0.896	0.224	234	0.936	0.234	236	0.944	0.236	233	0.932	0.233	240	0.96	0.24	242	0.968	0.242	245	0.98	0.245	252	1.008	0.252	261	1.044	0.261	265	1.06	0.265
	21	242	0.968	0.242	224	0.896	0.224	230	0.92	0.23	231	0.924	0.231	237	0.948	0.237	235	0.94	0.235	245	0.98	0.245	256	1.024	0.256	258	1.032	0.258	258	1.032	0.258	271	1.084	0.271	272	1.088	0.272	273	1.092	0.273	288	1.152	0.288	290	1.16	0.29	297	1.188	0.297
	22	247	0.988	0.247	225	0.9	0.225	228	0.912	0.228	227	0.908	0.227	231	0.924	0.231	232	0.928	0.232	243	0.972	0.243	248	0.992	0.248	250	1	0.25	247	0.988	0.247	253	1.012	0.253	254	1.016	0.254	255	1.02	0.255	266	1.064	0.266	269	1.076	0.269	278	1.112	0.278
	23	279	1.116	0.279	232	0.928	0.232	238	0.952	0.238	232	0.928	0.232	238	0.952	0.238	237	0.948	0.237	248	0.992	0.248	260	1.04	0.26	257	1.028	0.257	258	1.032	0.258	262	1.048	0.262	264	1.056	0.264	267	1.068	0.267	280	1.12	0.28	283	1.132	0.283	286	1.144	0.286
	24	248	0.992	0.248	230	0.92	0.23	234	0.936	0.234	235	0.94	0.235	243	0.972	0.243	241	0.964	0.241	254	1.016	0.254	265	1.06	0.265	261	1.044	0.261	264	1.056	0.264	267	1.068	0.267	272	1.088	0.272	276	1.104	0.276	290	1.16	0.29	291	1.164	0.291	301	1.204	0.301
	Mean (g)	245.75	0.983	0.24575	224.75	0.899	0.22475	227.125	0.9085	0.227125	224.875	0.8995	0.224875	231.75	0.927	0.23175	232.25	0.929	0.23225	242.5	0.97	0.2425	254.125	1.0165	0.254125	252.75	1.011	0.25275	253.375	1.0135	0.253375	259.875	1.0395	0.259875	262.875	1.0515	0.262875	264.75	1.059	0.26475	275.625	1.1025	0.275625	278.625	1.1145	0.278625	287.125	1.1485	0.287125
	SD	14.9833	0.0599333	0.0149833	7.16639	0.0286656	0.00716639	8.80645	0.0352258	0.00880645	9.4027	0.0376108	0.0094027	9.26977	0.0370791	0.00926977	7.59229	0.0303692	0.00759229	9.33503	0.0373401	0.00933503	10.8685	0.0434741	0.0108685	8.7137	0.0348548	0.0087137	10.5551	0.0422205	0.0105551	11.5194	0.0460776	0.0115194	11.9933	0.0479732	0.0119933	12.0564	0.0482257	0.0120564	14.851	0.0594042	0.014851	12.0586	0.0482345	0.0120586	14.5055	0.0580222	0.0145055
	Abbreviations:
	BW: body weight
	LD: low dose = 500 mg/kg b. w.
	HD: high dose = 1000 mg/kg b. w.
	SD: standard deviation
[truncated: 36 more columns]
