# Supplementary material for: Repeated-dose toxicity of common ragweed on rats
Source: PLoS One. 2017 May 4;12(5):e0176818. doi: 10.1371/journal.pone.0176818 (PMC5417505; doi:10.1371/journal.pone.0176818)
Supplement: S6 File — (XLSX) [file pone.0176818.s006.xlsx]

## Sheet: S6 Table
S6 - Absolute and relative organ weights
			A b s o l u t e o r g a n w e i g h t s ( g )									R e l a t i v e o r g a n w e i g h t s (t o 1 0 0 g b o d y w e i g h t)									R el a t i v e o r g a n w e i g h t s ( t o b r a i n w e i g h t)
Treatment groups	Identification number of animals	body weight*	heart	thymus	lung	liver	spleen	kidney	adrenal gland	brain	Identification number of animals	relative heart	relative thymus	relative lung	relative liver	relative spleen	relative kidney	relative adrenal gland	relative brain	Identification number of animals	rel. heart to brain	rel. thymus to brain	rel. lung to brain	rel. liver to brain	rel. spleen to brain	rel. kidney to brain	rel. adrenal gland to brain
Control group	1	348	0.8137	0.392	1.236	13.089	0.9006	1.9205	0.052	1.9917	1	0.233822	0.112644	0.355172	3.76121	0.258793	0.551868	0.0149425	0.572328	1	0.408545	0.196817	0.620575	6.57177	0.452177	0.964252	0.0261083
	2	406	0.9803	0.4888	1.3134	15.4117	0.832	2.5137	0.0635	2.1421	2	0.241453	0.120394	0.323498	3.79599	0.204926	0.619138	0.0156404	0.527611	2	0.457635	0.228187	0.613137	7.19467	0.388404	1.17347	0.0296438
	3	383	0.9797	0.3452	1.3794	15.867	0.9573	2.2135	0.0611	2.0563	3	0.255796	0.0901305	0.360157	4.14282	0.249948	0.577937	0.015953	0.536893	3	0.476438	0.167874	0.670817	7.71629	0.465545	1.07645	0.0297136
	4	376	0.9237	0.5159	1.3495	14.5062	0.7817	2.1002	0.0495	2.0802	4	0.245665	0.137207	0.35891	3.85803	0.207899	0.558564	0.0131649	0.553245	4	0.444044	0.248005	0.648736	6.97346	0.375781	1.00961	0.0237958
	5	358	0.8788	0.3799	1.3573	13.8257	0.5751	2.0561	0.0541	1.852	5	0.245475	0.106117	0.379134	3.86193	0.160642	0.57433	0.0151117	0.517318	5	0.474514	0.20513	0.732883	7.46528	0.310529	1.11021	0.0292117
	6	397	1.0296	0.3119	1.3264	15.784	0.8221	2.8937	0.0579	2.1417	6	0.259345	0.0785642	0.334106	3.97582	0.207078	0.728892	0.0145844	0.539471	6	0.48074	0.145632	0.619321	7.36985	0.383854	1.35112	0.0270346
	7	390	0.9778	0.5289	1.3009	15.1841	0.8313	2.5455	0.0756	2.1439	7	0.250718	0.135615	0.333564	3.89336	0.213154	0.652692	0.0193846	0.549718	7	0.456085	0.2467	0.606791	7.08247	0.387751	1.18732	0.0352628
	8	389	0.9749	0.3134	1.2953	15.4952	0.8425	2.128	0.0659	1.9777	8	0.250617	0.0805656	0.332982	3.98334	0.216581	0.547044	0.0169409	0.508406	8	0.492946	0.158467	0.654953	7.83496	0.426	1.076	0.0333215
	Mean (g)	380.875	0.944813	0.4095	1.31977	14.8954	0.817825	2.2964	0.05995	2.0482	Mean (g)	0.247861	0.107655	0.34719	3.90906	0.214878	0.601308	0.0157153	0.538124	Mean (g)	0.461368	0.199601	0.645902	7.27609	0.398755	1.11855	0.0292615
	SD	19.5407	0.0693364	0.0893977	0.0445692	1.00015	0.111826	0.324875	0.00849437	0.10314	SD	0.00810014	0.0230895	0.0189348	0.122087	0.0300342	0.0629352	0.00184286	0.0205733	SD	0.0264699	0.0396917	0.0417948	0.411002	0.0490173	0.120217	0.00373456
	Identification number of animals	body weight*	heart	thymus	lung	liver	spleen	kidney	adrenal gland	brain	Identification number of animals	relative heart	relative thymus	relative lung	relative liver	relative spleen	relative kidney	relative adrenal gland	relative brain	Identification number of animals	rel. heart to brain	rel. thymus to brain	rel. lung to brain	rel. liver to brain	rel. spleen to brain	rel. kidney to brain	rel. adrenal gland to brain
Low dose group	9	314	0.7999	0.382	1.1976	11.237	0.7119	2.1632	0.053	1.9011	9	0.254745	0.121656	0.381401	3.57866	0.22672	0.688917	0.016879	0.605446	9	0.420756	0.200936	0.629951	5.91079	0.374467	1.13787	0.0278786
	10	309	0.8346	0.249	1.1848	10.3649	0.7029	1.8665	0.0632	1.995	10	0.270097	0.0805825	0.38343	3.35434	0.227476	0.604045	0.0204531	0.645631	10	0.418346	0.124812	0.593885	5.19544	0.352331	0.935589	0.0316792
	11	315	0.8731	0.406	0.9866	10.6059	1.065	2.0607	0.0597	1.9946	11	0.277175	0.128889	0.313206	3.36695	0.338095	0.65419	0.0189524	0.633206	11	0.437732	0.20355	0.494636	5.31731	0.533942	1.03314	0.0299308
	12	327	0.8412	0.422	1.3106	12.069	0.7571	2.0194	0.0581	2.0572	12	0.257248	0.129052	0.400795	3.69083	0.231529	0.617554	0.0177676	0.629113	12	0.408905	0.205133	0.63708	5.86671	0.368024	0.981626	0.0282423
	13	367	0.9412	0.4935	1.2364	13.2591	0.9959	2.3917	0.0624	2.0306	13	0.256458	0.134469	0.336894	3.61283	0.271362	0.651689	0.0170027	0.553297	13	0.463508	0.243032	0.608884	6.52965	0.490446	1.17783	0.0307298
	14	336	0.8422	0.402	1.315	12.0647	0.7146	2.2709	0.0555	2.0954	14	0.250655	0.119643	0.391369	3.59068	0.212679	0.675863	0.0165179	0.623631	14	0.401928	0.191849	0.627565	5.75771	0.341033	1.08375	0.0264866
	15	384	0.9049	0.4375	1.2583	13.7636	0.7747	2.3307	0.0562	2.0525	15	0.235651	0.113932	0.327682	3.58427	0.201745	0.606953	0.0146354	0.534505	15	0.440877	0.213155	0.613057	6.70577	0.377442	1.13554	0.0273812
	16	406	0.9629	0.2736	1.3586	14.5076	0.8635	2.1593	0.0543	2.1725	16	0.237167	0.0673892	0.334631	3.5733	0.212685	0.531847	0.0133744	0.535099	16	0.443222	0.125938	0.625362	6.67784	0.397468	0.993924	0.0249942
	Mean (g)	344.75	0.875	0.3832	1.23099	12.234	0.8232	2.1578	0.0578	2.03736	Mean (g)	0.254899	0.111952	0.358676	3.54398	0.240286	0.628882	0.0169478	0.594991	Mean (g)	0.429409	0.188551	0.603802	5.99515	0.404394	1.05991	0.0284153
	SD	36.4251	0.0566908	0.0823898	0.11553	1.50019	0.139023	0.173562	0.00372559	0.0797224	SD	0.0143331	0.0245339	0.0339176	0.119209	0.0446681	0.0501625	0.0022452	0.0464493	SD	0.0204493	0.041783	0.0462105	0.589883	0.0695963	0.0869533	0.00223982
	Identification number of animals	body weight*	heart	thymus	lung	liver	spleen	kidney	adrenal gland	brain	Identification number of animals	relative heart	relative thymus	relative lung	relative liver	relative spleen	relative kidney	relative adrenal gland	relative brain	Identification number of animals	rel. heart to brain	rel. thymus to brain	rel. lung to brain	rel. liver to brain	rel. spleen to brain	rel. kidney to brain	rel. adrenal gland to brain
High dose group	17	327	0.8045	0.3428	1.3422	10.1037	0.8114	2.0067	0.0636	2.01	17	0.246024	0.104832	0.410459	3.08982	0.248135	0.61367	0.0194495	0.614679	17	0.400249	0.170547	0.667761	5.02672	0.403682	0.998358	0.0316418
	18	359	0.8777	0.4545	1.3232	13.123	0.8948	2.2035	0.0667	2.1132	18	0.244485	0.126602	0.368579	3.65543	0.249248	0.613788	0.0185794	0.588635	18	0.415342	0.215077	0.626159	6.21001	0.423434	1.04273	0.0315635
	19	335	0.8749	0.4393	1.1317	11.0155	0.6701	2.3084	0.0712	2.0077	19	0.261164	0.131134	0.337821	3.28821	0.20003	0.689075	0.0212537	0.599313	19	0.435772	0.218808	0.56368	5.48663	0.333765	1.14977	0.0354635
	20	305	0.8307	0.3331	1.2366	9.3914	0.6789	1.5413	0.0422	1.9469	20	0.272361	0.109213	0.405443	3.07915	0.22259	0.505344	0.0138361	0.638328	20	0.426678	0.171093	0.635164	4.82377	0.348708	0.791669	0.0216755
	21	359	0.9116	0.3064	1.294	12.4511	0.78	2.4245	0.0772	2.1379	21	0.253928	0.0853482	0.360446	3.46827	0.21727	0.675348	0.0215042	0.595515	21	0.4264	0.143318	0.605267	5.82399	0.364844	1.13406	0.0361102
	22	331	0.9738	0.2928	1.089	10.3715	0.8709	4.26	0.0662	1.9854	22	0.294199	0.0884592	0.329003	3.13338	0.263112	1.28701	0.02	0.599819	22	0.490481	0.147477	0.548504	5.22388	0.438652	2.14566	0.0333434
	23	373	0.9757	0.2952	1.4043	14.4664	0.9427	2.0267	0.0629	2.058	23	0.261582	0.0791421	0.376488	3.87839	0.252735	0.543351	0.0168633	0.551743	23	0.474101	0.14344	0.682362	7.02935	0.458066	0.984791	0.0305637
	24	380	0.9116	0.277	1.3058	15.3109	0.8295	2.2466	0.0601	2.1056	24	0.239895	0.0728947	0.343632	4.02918	0.218289	0.591211	0.0158158	0.554105	24	0.432941	0.131554	0.620156	7.27151	0.393949	1.06696	0.0285429
	Mean (g)	346.125	0.895062	0.342638	1.26585	12.0292	0.809788	2.37721	0.0637625	2.04559	Mean (g)	0.259205	0.0997031	0.366484	3.45273	0.233926	0.689849	0.0184127	0.592767	Mean (g)	0.437745	0.167664	0.618632	5.86198	0.395638	1.16425	0.0311131
	SD	25.6651	0.0612968	0.0679321	0.10744	2.15556	0.0975047	0.806933	0.0102091	0.0685694	SD	0.0177213	0.0217194	0.0300977	0.369389	0.0221733	0.248893	0.00270822	0.0289109	SD	0.0299734	0.0333267	0.0461731	0.909922	0.0440237	0.411802	0.00455646
Abbreviations:
SD: standard deviation
*: body weight of the rat on the day of the dissection
: p<0,05 versus control
: p<0,01 versus control
For statistical analysis of the kidney data of two animals (identification number 20 and 22) were excluded.
Macroscopic observation of the organs Control group: No alteration found in any organ. Low dose group: No alteratio found in any organ. High dose group: Rat No. 20: right kidney is extremely enlarged, filled with fluid. Right adrenal is visibly smaller than normal. The whole kidney was sent to histopathologist. Rat No. 22: both kidneys are extremely enlarged, filled with fluid. Diameters are appr…
