# Supplementary material for: Repeated-dose toxicity of common ragweed on rats
Source: PLoS One. 2017 May 4;12(5):e0176818. doi: 10.1371/journal.pone.0176818 (PMC5417505; doi:10.1371/journal.pone.0176818)
Supplement: S7 File — (XLSX) [file pone.0176818.s007.xlsx]

## Sheet: S7
	S7. Histopathological pictures and description
	1:1 magnification of kidney tissue
	1:1 magnification of kidney tissue
	1:50 magnification of kidney tissue
	OPINION OF THE HISTOPATHOLOGIST (by László Tiszlavicz, University of Szeged, Faculty of Medicine, Department of Pathology) Macroscopic description: The kidneys are large, pale, have a smooth surface, and contain numerous 2 - 15 mm diameter cysts that have clear or opaque walls and contain liquid material. Histopathologic description of kidneys: Multifocally approximately 50% of the cortex and med…
